# Supplementary material
Source: HighWire-hosted journal article supplement (https://openres.ersjournals.com/highwire/filestream/10895/field_highwire_adjunct_files/0/ERJOR-00026-2015_table_S5.pdf)
Supplement: ERJOR-00026-2015_table_S5.pdf [file ERJOR-00026-2015_table_S5.pdf]

**Table S5: Risk of current asthma in normal weight women by years of HC use**

| Years of HC use | Odds Ratio | 95% CI†   | P value |
|-----------------|------------|-----------|---------|
| Nil             | 1.20       | 0.78,1.85 | 0.41    |
| 5 years         | 0.99       | 0.72,1.35 | 0.93    |
| 10 years        | 0.81       | 0.64,1.04 | 0.093   |
| 15 years        | 0.67       | 0.51,0.87 | 0.003   |
| 20 years        | 0.55       | 0.38,0.79 | 0.001   |
| 25 years        | 0.45       | 0.28,0.74 | 0.001   |
| 30 years        | 0.37       | 0.20,0.70 | 0.002   |

† Adjusted for maternal atopy, current smoking status and social class
